# TABLE OF CONTENTS

# ANESTHESIOLOGY

Volume 134

Issue 4

April 2021

◇ **This Month in ANESTHESIOLOGY** ..... 1A  
**Science, Medicine, and the Anesthesiologist**..... 13A  
**Infographics in Anesthesiology** ..... 17A

◆ **Editorials**

**Opioid-free Anesthesia: Time to Regain Our Balance**  
*E. D. Kharasch, J. D. Clark*.....509

**Consciousness, Anesthesia, and Acetylcholine**  
*D. Pal, G. A. Mashour*.....515

**Special Articles**

**COVID-19, Personal Protective Equipment, and Human Performance**  
*K. J. Ruskin, A. C. Ruskin, B. T. Musselman, J. R. Harvey,  
 T. E. Nesthus, M. O'Connor*.....518

Experience from the COVID-19 pandemic has shown how personal protective equipment degrades the performance of individual clinicians and teams. This experience can be improved with a systematic approach to collectively managing these stressors.

**Anesthesiologists' Role in Value-based Perioperative Care and Healthcare Transformation**  
*A. Mahajan, S. A. Esper, D. J. Cole, L. A. Fleisher* .....526

Health care is undergoing transformation with a shift from fee-for-service care to fee-for-value care. Anesthesiologists are in a unique position to improve patient outcomes and manage cost through institution of novel perioperative care programs for the surgical patients.

**Perioperative Medicine**

**CLINICAL SCIENCE**

◆ ◆ **Balanced Opioid-free Anesthesia with Dexmedetomidine *versus* Balanced Anesthesia with Remifentanyl for Major or Intermediate Noncardiac Surgery: The Postoperative and Opioid-free Anesthesia (POFA) Randomized Clinical Trial**  
  
*H. Beloeil, M. Garot, G. Lebuffe, A. Gerbaud, J. Bila, P. Cuvillon,  
 E. Dubout, S. Oger, J. Nadaud, A. Bécrot, N. Coullier, S. Lecoeur,  
 J. Fayon, T. Godet, M. Mazerolles, F. Atallah, S. Sigaut, P.-M. Choinier,  
 K. Asehnoune, A. Roquilly, G. Chanques, M. Esvan,  
 E. Futier, B. Laviolle, for the POFA Study Group  
 and the SFAR Research Network* .....541

In a randomized, blinded, multicenter trial, study patients undergoing noncardiac surgery received a standard anesthetic featuring lidocaine and ketamine, plus either remifentanyl or an alternative anesthetic where dexmedetomidine was substituted for remifentanyl. The primary outcome composed of postoperative hypoxemia, ileus, and cognitive dysfunction, was more common among patients receiving opioid-free anesthesia. Importantly, opioid-free anesthesia with dexmedetomidine was associated with severe bradycardia, and the study was terminated early for that reason. **SUPPLEMENTAL DIGITAL CONTENT IS AVAILABLE IN THE TEXT**

◇ Refers to This Month in ANESTHESIOLOGY

◆ Refers to Editorial

 This article has an Audio Podcast

 See Supplemental Digital Content

 CME Article

 This article has a Video Abstract

 Part of the Letheron writing competition

 This article has a Visual Abstract

 OPEN This article is Open Access

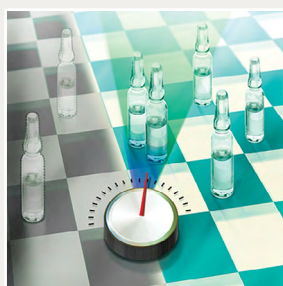

**ON THE COVER:** It has been speculated that opioid-free anesthesia may provide adequate pain control while reducing postoperative opioid consumption; however, there is currently no evidence to support the speculation. In this issue of ANESTHESIOLOGY, Beloeil *et al.* tested the hypothesis that opioid-free balanced anesthetic with dexmedetomidine would reduce postoperative opioid-related adverse events compared to balanced anesthesia with remifentanyl. Also in this issue, Shanthanna *et al.* present a critical review of opioid-free *versus* opioid-sparing approaches. In an accompanying editorial, Kharasch and Clark review the evolution of opioid-free anesthesia and call for a balanced approach to use of opioids in moderation going forward. Cover Illustration: A. Johnson, Vivo Visuals.

- Beloeil *et al.*: Balanced Opioid-free Anesthesia with Dexmedetomidine *versus* Balanced Anesthesia with Remifentanyl for Major or Intermediate Noncardiac Surgery: The Postoperative and Opioid-free Anesthesia (POFA) Randomized Clinical Trial, p. 541
- Shanthanna *et al.*: Perioperative Opioid Administration: A Critical Review of Opioid-free *versus* Opioid-sparing Approaches, p. 645
- Kharasch and Clark: Opioid-free Anesthesia: Time to Regain Our Balance, p. 509

 **Association between In-hospital Mortality and Low Cardiac Output**

 **Syndrome with Morning versus Afternoon Cardiac Surgery:**

**A Retrospective Cohort Study**

R. M. Hijazi, D. I. Sessler, C. Liang, F. A. Rodriguez-Patarroyo,  
E. G. Soltész, A. E. Duncan.....552

A retrospective cohort study evaluated 9,734 patients who had aortic valve, mitral valve, and/or coronary artery bypass graft surgery over 7 yr at a single center. The confounder-adjusted incidence of the composite outcome of in-hospital low cardiac output syndrome or mortality was similar for morning and afternoon surgery. The results do not support selective morning or afternoon scheduling for cardiac surgery. *SUPPLEMENTAL DIGITAL CONTENT IS AVAILABLE IN THE TEXT*

 **A Lower Tidal Volume Regimen during One-lung Ventilation for Lung**

 **Resection Surgery Is Not Associated with Reduced Postoperative Pulmonary Complications**

D. A. Colquhoun, A. M. Leis, A. M. Shanks, M. R. Mathis, B. I. Naik,  
M. E. Durieux, S. Kheterpal, N. L. Pace, W. M. Popescu,  
R. B. Schonberger, B. D. Kozower, D. M. Walters, J. D. Blasberg,  
A. C. Chang, M. F. Aziz, I. Harukuni, B. H. Tieu, R. S. Blank.....562

This five-center retrospective observational study evaluated records from 3,232 thoracic surgical patients who underwent one-lung ventilation for pneumonectomies, bilobectomies, single lobectomies, segmentectomies, or wedge resections. Patients with tidal volumes 5 ml/kg or lower and positive end-expiratory pressure greater than 5 cm H<sub>2</sub>O did not have significantly different 30-day adverse pulmonary outcomes compared with patients not ventilated with this strategy. Higher mechanical ventilation driving pressures were not associated with composite 30-day adverse pulmonary outcome. The protective ventilation regimen tested was not associated with decreased pulmonary complications. *SUPPLEMENTAL DIGITAL CONTENT IS AVAILABLE IN THE TEXT*

 **Complications as a Mediator of the Perioperative Frailty–Mortality**

 **Association: Mediation Analysis of a Retrospective Cohort**

 D. I. McIsaac, S. D. Aucoin, G. L. Bryson,  
G. M. Hamilton, M. M. Lalu.....577

In a retrospective cohort study of intermediate- to high-risk elective noncardiac surgery patients, complications mediated over half of the association between frailty and postoperative mortality. Cardiopulmonary complications contributed to this association with a higher probability than renal or infectious events. *SUPPLEMENTAL DIGITAL CONTENT IS AVAILABLE IN THE TEXT*

**BASIC SCIENCE**

 **Forebrain Acetylcholine Modulates Isoflurane and Ketamine**

 **Anesthesia in Adult Mice**

L. S. Leung, L. Chu, M. A. M. Prado, V. F. Prado.....588

In genetically modified mice lacking the vesicular acetylcholine transporter in the forebrain, lower doses of isoflurane and ketamine were necessary to induce the loss of the righting reflex, a surrogate for loss of consciousness, when compared to wild-type counterparts. Hippocampal gamma power was lower in genetically modified mice lacking forebrain acetylcholine than in the wild-type mice during both isoflurane and ketamine anesthesia. These observations suggest that forebrain cholinergic neurons modulate anesthetic sensitivity during isoflurane and ketamine anesthesia. *SUPPLEMENTAL DIGITAL CONTENT IS AVAILABLE IN THE TEXT*

 **Hemodynamic Parameters in the Assessment of Fluid Status in a Porcine Hemorrhage and Resuscitation Model**

E. S. Wise, K. M. Hocking, M. E. Polcz, G. J. Beilman,  
C. M. Brophy, J. H. Sobey, P. J. Leisy, R. K. Kiberenge,  
B. D. Alvis.....607

In anesthetized pigs who underwent incremental hemorrhage, resuscitation and over-resuscitation with crystalloid, blood pressure, mean pulmonary artery pressure, pulmonary capillary wedge pressure, and central venous pressure decreased with hemorrhage, but only central hemodynamic parameters increased with resuscitation and over-resuscitation. Pulmonary capillary wedge pressure had the closest correlation with the volume of crystalloid resuscitation administered.

**Pain Medicine**

**CLINICAL SCIENCE**

 **Median Effective Volume of 0.5% Ropivacaine for**

 **Ultrasound-guided Costoclavicular Block: A Dose-finding Study**

A. Kewlani, N. Bhatia, J. K. Makkar, V. Kumar.....617

Forty patients were enrolled in a dose-finding study using 0.5% ropivacaine and an up-and-down sequential allocation study design. It was determined that 19 ml of 0.5% ropivacaine is likely to produce adequate surgical anesthesia for 95% of patients using this block technique.

**Education**

**IMAGES IN ANESTHESIOLOGY**

 **Paradoxical Vocal Fold Motion Disorder in the Postanesthesia Care Unit**

J. D. Farley, M. Cheney, M. S. Eckmann, B. Wallisch.....626

*SUPPLEMENTAL DIGITAL CONTENT IS AVAILABLE IN THE TEXT*

**Pulsus Bisferiens on Extracorporeal Membrane Oxygenation**

M. S. Tahir Janjua, S. Shukla, H. Tantawy.....628

**CLINICAL FOCUS REVIEWS**

- CME** ◇ **Management of Patient–Ventilator Asynchrony**  
*J. M. Bailey*.....629

Patient–ventilator asynchrony can often be corrected by ventilator adjustment rather than sedation.

- Appropriate Clinical Use of Lactate Measurements**  
*R. M. Pino, J. Singh*.....637

Elevated lactate can result from many pathophysiologic processes. Understanding the mechanism of lactate production, metabolism, and the basics of lactic acidosis will enable the appropriate use of laboratory tests and interpretation.

**REVIEW ARTICLE**

- ◆ ◇ **Perioperative Opioid Administration: A Critical Review of Opioid-free versus Opioid-sparing Approaches**  
*H. Shanthanna, K. S. Ladha, H. Kehlet, G. P. Joshi*.....645

Opioid-free strategies do not offer any advantages beyond recognized opioid-sparing approaches and are unrealistic in routine clinical practice. Undue enthusiasm and efforts at implementing them may distract us from optimizing pain and long-term outcomes.

**MIND TO MIND**

- Surgical Progress?**  
*N. J. Brown*.....660
- Beirut**  
*C. Zeeni*.....661

**Correspondence**

- Perioperative Use of Gabapentinoids: Comment**  
*B. L. d. C. Araujo*.....664

- Perioperative Use of Gabapentinoids: Comment**  
*P.-Y. P. Su, Z. Guan*.....665

- Perioperative Use of Gabapentinoids: Reply**  
*M. Verret, R. Zarychanski, F. Lauzier, A. F. Turgeon*.....666

- Fasting Duration and Blood Pressure in Children: Comment**  
*C. Chen, C. Mpydy*.....667

- Fasting Duration and Blood Pressure in Children: Comment**  
*R. Sharma, B. I. Naik*.....668

- Fasting Duration and Blood Pressure in Children: Reply**  
*A. F. Sempao, L. Wu, O. Nelson, J. A. Gálvez, J. M. Tan, J. O. Wasey, W. T. Muhly, F.-C. Tsui, A. J. Masino, P. A. Stricker*.....668

- Etymology of *Anesthesiology* and *Anesthesia*, Redux**  
*D. F. Janssen*.....670

**Erratum ..... 672**

**Anesthesiology Reflections from the Wood Library-Museum**

- From Cigar to Green Whistle: The Unfinished Tale of the Methoxyflurane Inhaler**  
*Jane S. Moon and Melissa L. Coleman*.....576

- Magneto-Electric Machine's Shocking Treatment: Sparks of Genius or Flash in the Pan?**  
*Melissa L. Coleman and Jane S. Moon*.....587

- Ambu: The Reanimating Invention of a *Bon Vivant***  
*Jane S. Moon and Melissa L. Coleman*.....659

**Careers & Events ..... 19A**

## INSTRUCTIONS FOR AUTHORS

The most recently updated version of the Instructions for Authors is available at [www.anesthesiology.org](http://www.anesthesiology.org). Please refer to the Instructions for the preparation of any material for submission to ANESTHESIOLOGY.

Manuscripts submitted for consideration for publication must be submitted in electronic format via Editorial Manager (<https://www.editorialmanager.com/aln>). Detailed directions for submission and the most recent version of the Instructions for Authors can be found on the Journal's Web site (<http://www.anesthesiology.org>). Books and educational materials for review should be sent to Alan Jay Schwartz, M.D., M.S.Ed., Director of Education, Department of Anesthesiology and Critical Care Medicine, The Children's Hospital of Philadelphia,

34th Street and Civic Center Blvd., Room 9327, Philadelphia, Pennsylvania 19104-4399. Article-specific permission requests are managed with Copyright Clearance Center's Rightslink service. Information can be accessed directly from articles on the journal Web site. More information is available at <http://anesthesiology.pubs.asahq.org/public/rightsandpermissions.aspx>. For questions about the Rightslink service, e-mail [customercare@copyright.com](mailto:customercare@copyright.com) or call 877-622-5543 (U.S. only) or 978-777-9929. Advertising and related correspondence should be addressed to Advertising Manager, ANESTHESIOLOGY, Wolters Kluwer Health, Inc., Two Commerce Square, 2001 Market Street, Philadelphia, Pennsylvania 19103 (Web site: <http://www.wkadcenter.com/>). Publication of an advertisement in ANESTHESIOLOGY does not constitute endorsement by the Society or Wolters Kluwer Health, Inc. of the product or service described therein or of any representations made by the advertiser with respect to the product or service.

**ANESTHESIOLOGY** (ISSN 0003-3022) is published monthly by Wolters Kluwer Health, Inc., 14700 Citicorp Drive, Bldg 3, Hagerstown, MD 21742. Business office: Two Commerce Square, 2001 Market Street, Philadelphia, PA 19103. Periodicals postage paid at Hagerstown, MD, and at additional mailing offices. Copyright © 2021, the American Society of Anesthesiologists, Inc. All Rights Reserved.

**Annual Subscription Rates:** *United States*—\$1077 Individual, \$2671 Institution, \$434 In-training. *Rest of World*—\$1136 Individual, \$2965 Institution, \$434 In-training. Single copy rate \$266. Subscriptions outside of North America must add \$58 for airfreight delivery. Add state sales tax, where applicable. The GST tax of 7% must be added to all orders shipped to Canada (Wolters Kluwer Health, Inc.'s GST Identification #895524239, Publications Mail Agreement #1119672). Indicate in-training status and name of institution. Institution rates apply to libraries, hospitals, corporations, and partnerships of three or more individuals. Subscription prices outside the United States must be prepaid. Prices subject to change without notice. Subscriptions will begin with currently available issue unless otherwise requested. Visit us online at [www.lww.com](http://www.lww.com).

Individual and in-training subscription rates include print and access to the online version. Online-only subscriptions for individuals (\$356) and persons in training (\$356) are available to nonmembers and may be ordered by downloading a copy of the Online Subscription FAXback Form from the Web site, completing the information requested, and faxing the completed form to 301-223-2400. Institutional rates are for print only; online subscriptions are available via Ovid. Institutions can choose to purchase a print and online subscription together for a discounted rate. Institutions that wish to purchase a print subscription, please contact Wolters Kluwer Health, Inc.,

14700 Citicorp Drive, Bldg 3, Hagerstown, MD 21742; phone: 800-638-3030; fax: 301-223-2400. Institutions that wish to purchase an online subscription or online with print, please contact the Ovid Regional Sales Office near you or visit [www.ovid.com/site/index.jsp](http://www.ovid.com/site/index.jsp) and select Contact and Locations.

**Address for non-member subscription information, orders, or change of address:** Wolters Kluwer Health, Inc., 14700 Citicorp Drive, Bldg 3, Hagerstown, MD 21742; phone: 800-638-3030; fax: 301-223-2400.

**Address for member subscription information, orders, or change of address:** Members of the American Society of Anesthesiologists receive the print and online journal with their membership. To become a member or provide a change of address, please contact the American Society of Anesthesiologists, 1061 American Lane, Schaumburg, Illinois 60173-4973; phone: 847-825-5586; fax: 847-825-1692; e-mail: [membership@ASAHQ.org](mailto:membership@ASAHQ.org). For all other membership inquiries, contact Wolters Kluwer Health, Inc., Customer Service Department, P.O. Box 1610, Hagerstown, MD 21740; phone: 800-638-3030; fax: 301-223-2400.

**Postmaster:** Send address changes to ANESTHESIOLOGY, P.O. BOX 1610, Hagerstown, MD 21740.

**Advertising:** Please contact Hilary Druker, National Account Manager, Health Learning, Research & Practice, Medical Journals, Wolters Kluwer Health, Inc.; phone: 609-304-9187; e-mail: [HilaryDruker@wolterskluwer.com](mailto:HilaryDruker@wolterskluwer.com). For classified advertising: Dave Wiegand, Recruitment Advertising Representative, Wolters Kluwer Health, Inc.; phone: 847-361-6128; e-mail: [Dave.Wiegand@wolterskluwer.com](mailto:Dave.Wiegand@wolterskluwer.com).
